# Supplementary material
Source: publisher site journal article supplement (https://www.dovepress.com/article/299796)
Supplement: Supplementary file 1 [file get_supplementary_file.php]

**Table S1. A self-administered questionnaire to assess the general health, educational and and olfactory status of the study participants**

| Q1. How is your usual general health status?  ① Excellent  ② Very good  ③ Good  ④ Poor  ⑤ Fair |
| --- |
| Q2. Are you currently receiving treatment for a depression or have you ever had it before?  ① Yes  ② No |
| Q3. What is your final education level?  ① Under high school graduation  ② High school graduation or higher |
| Q4. What do you think your sense of smell is usually?  ① No problems with sense of smell  ② Impaired of sense of smell  ③ I don’t know |
| Q4-1. If you checked number 2 in Q4, how long has your sense of smell impaired?    ----- (months) |
| Q4-2. Please, indicate how much you smell as a score.  (0=I can’t smell it at all, 10=I smell very well)  ----(score) |
| Q.5. Have you ever been treated for impaired sense of smell?  ① Yes  ② No |
| Q6. Have you ever had an otolaryngology treatment with sinusitis or olfactory dysfunction?  ① Yes  ② No |
| Q7. Have you ever had a nasal endoscopy at an otolaryngologist?  ① Yes  ② No |
| Q8. Have you ever heard of nasal polyp?  ① Yes  ② No  ③ I don’t know |
| Q9. Have you ever heard of a crooked nose?  ① Yes  ② No  ③ I don’t know |
